# Supplementary material for: Association of Sleep Duration and Insomnia Symptoms with Components of Metabolic Syndrome and Inflammation in Middle-Aged and Older Adults with Metabolic Syndrome in Taiwan
Source: MDPI journal article supplement (doi:10.3390/nu11081848), 2019-08-09
Supplement: s1 [file s1]

## Supplementary Material: Association of sleep duration and insomnia symptoms with components of metabolic syndrome and inflammation in middle-aged and older adults with metabolic syndrome in Taiwan

Table S1. Dietary intake of the subjects across sleep duration <sup>1</sup>.

| Variables                | Sleep Duration (hours/day) |                             |                           | <i>p</i> -Value |
|--------------------------|----------------------------|-----------------------------|---------------------------|-----------------|
|                          | <6<br>( <i>n</i> = 6,223)  | 6-8<br>( <i>n</i> = 17,356) | >8<br>( <i>n</i> = 2,398) |                 |
| Milk                     |                            |                             |                           | 0.000           |
| None or <1 serving/week  | 56.2                       | 48.4                        | 49.3                      |                 |
| 1-3 servings/week        | 20.5                       | 27.6                        | 25.8                      |                 |
| 4-6 servings/week        | 9.8                        | 9.2                         | 8.9                       |                 |
| 1 serving/day            | 11.8                       | 13.7                        | 14.7                      |                 |
| ≥2 servings/day          | 1.7                        | 1.1                         | 1.3                       |                 |
| Dairy products           |                            |                             |                           | 0.000           |
| None or <1 serving/week  | 71.2                       | 66.1                        | 68.7                      |                 |
| 1-3 servings/week        | 21.6                       | 27.7                        | 24.9                      |                 |
| 4-6 servings/week        | 4.1                        | 3.1                         | 2.9                       |                 |
| 1 serving/day            | 2.9                        | 3.0                         | 3.2                       |                 |
| ≥2 servings/day          | 0.2                        | 0.1                         | 0.3                       |                 |
| Eggs                     |                            |                             |                           | 0.000           |
| None or <1 serving/week  | 17.6                       | 16.8                        | 19.7                      |                 |
| 1-3 servings/week        | 56.8                       | 55.0                        | 55.6                      |                 |
| 4-6 servings/week        | 14.1                       | 17.4                        | 14.5                      |                 |
| 1 serving/day            | 10.2                       | 10.1                        | 9.3                       |                 |
| ≥2 servings/day          | 1.3                        | 0.7                         | 0.9                       |                 |
| Meat                     |                            |                             |                           | 0.000           |
| None or <1 serving/week  | 11.4                       | 11.2                        | 11.5                      |                 |
| 1-3 servings/week        | 37.3                       | 37.4                        | 41.5                      |                 |
| 4-6 servings/week        | 22.6                       | 25.4                        | 22.7                      |                 |
| 1 serving/day            | 21.4                       | 20.7                        | 18.9                      |                 |
| ≥2 servings/day          | 7.3                        | 5.3                         | 5.4                       |                 |
| Seafood                  |                            |                             |                           | 0.000           |
| None or <1 serving/week  | 18.3                       | 17.0                        | 18.3                      |                 |
| 1-3 servings/week        | 47.2                       | 48.0                        | 49.3                      |                 |
| 4-6 servings/week        | 22.5                       | 22.3                        | 20.0                      |                 |
| 1 serving/day            | 10.7                       | 11.2                        | 10.9                      |                 |
| ≥2 servings/day          | 1.3                        | 1.5                         | 1.5                       |                 |
| Beans                    |                            |                             |                           | 0.000           |
| None or <1 serving/week  | 20.9                       | 22.0                        | 22.0                      |                 |
| 1-3 servings/week        | 50.1                       | 51.4                        | 51.4                      |                 |
| 4-6 servings/week        | 19.2                       | 17.6                        | 17.6                      |                 |
| 1 serving/day            | 8.1                        | 7.8                         | 7.8                       |                 |
| ≥2 servings/day          | 1.7                        | 1.2                         | 1.2                       |                 |
| Light-colored vegetables |                            |                             |                           | 0.000           |
| None or <1 serving/week  | 13.7                       | 14.6                        | 14.0                      |                 |
| 1-3 servings/week        | 52.0                       | 57.2                        | 56.9                      |                 |
| 4-6 servings/week        | 24.3                       | 19.7                        | 20.2                      |                 |
| 1 serving/day            | 8.0                        | 6.6                         | 6.8                       |                 |

|                         |      |      |      |       |
|-------------------------|------|------|------|-------|
| ≥ 2 servings/day        | 2.0  | 1.9  | 2.1  |       |
| Dark-colored vegetables |      |      |      | 0.000 |
| None or <1 serving/week | 13.4 | 16.2 | 15.2 |       |
| 1-3 servings/week       | 55.9 | 57.9 | 58.3 |       |
| 4-6 servings/week       | 23.6 | 18.6 | 18.7 |       |
| 1 serving/day           | 5.0  | 5.7  | 5.9  |       |
| ≥2 servings/day         | 2.1  | 1.6  | 1.9  |       |
| Fruits                  |      |      |      | 0.000 |
| None or <1 serving/week | 26.5 | 25.4 | 26.7 |       |
| 1-3 servings/week       | 55.3 | 59.2 | 59.5 |       |
| 4-6 servings/week       | 14.4 | 12.1 | 11.0 |       |
| 1 serving/day           | 2.9  | 2.6  | 2.2  |       |
| ≥2 servings/day         | 0.9  | 0.7  | 0.6  |       |
| Rice                    |      |      |      | 0.000 |
| None or <1 serving/week | 17.1 | 15.0 | 15.2 |       |
| 1-3 servings/week       | 40.6 | 48.2 | 50.4 |       |
| 4-6 servings/week       | 37.9 | 29.1 | 27.8 |       |
| 1 serving/day           | 3.1  | 6.4  | 5.6  |       |
| ≥2 servings/day         | 1.3  | 1.3  | 1.0  |       |
| Whole grains            |      |      |      | 0.000 |
| None or <1 serving/week | 41.9 | 43.4 | 42.5 |       |
| 1-3 servings/week       | 31.0 | 36.2 | 35.6 |       |
| 4-6 servings/week       | 10.7 | 8.2  | 8.5  |       |
| 1 serving/day           | 11.5 | 8.3  | 9.5  |       |
| ≥2 servings/day         | 4.9  | 3.9  | 3.9  |       |
| Root crops              |      |      |      | 0.000 |
| None or <1 serving/week | 45.2 | 50.2 | 51.4 |       |
| 1-3 servings/week       | 40.6 | 40.3 | 38.9 |       |
| 4-6 servings/week       | 11.1 | 7.5  | 7.2  |       |
| 1 serving/day           | 2.1  | 1.6  | 2.0  |       |
| ≥2 servings/day         | 1.0  | 0.4  | 0.5  |       |
| Breads                  |      |      |      | 0.000 |
| None or <1 serving/week | 39.6 | 38.5 | 41.1 |       |
| 1-3 servings/week       | 40.1 | 43.5 | 42.0 |       |
| 4-6 servings/week       | 13.4 | 11.4 | 10.0 |       |
| 1 serving/day           | 6.3  | 6.3  | 6.7  |       |
| ≥2 servings/day         | 0.6  | 0.3  | 0.2  |       |
| Instant noodles         |      |      |      | 0.000 |
| None or <1 serving/week | 82.7 | 84.1 | 83.3 |       |
| 1-3 servings/week       | 15.4 | 15.0 | 15.6 |       |
| 4-6 servings/week       | 1.4  | 0.7  | 0.8  |       |
| 1 serving/day           | 0.2  | 0.1  | 0.2  |       |
| ≥2 servings/day         | 0.3  | 0.1  | 0.1  |       |
| Sugar                   |      |      |      | 0.000 |
| None or <1 serving/week | 50.4 | 55.9 | 55.1 |       |
| 1-3 servings/week       | 37.8 | 35.0 | 34.8 |       |
| 4-6 servings/week       | 7.1  | 5.7  | 6.0  |       |
| 1 serving/day           | 3.8  | 2.9  | 3.6  |       |
| ≥2 servings/day         | 0.9  | 0.5  | 0.5  |       |

<sup>1</sup> Data are presented as %.
